# Supplementary material for: Time-series forecasting through recurrent topology
Source: Springer Nature journal article supplement (doi:10.1038/s44172-023-00142-8), 2024-01-09
Supplement: 44172_2023_142_MOESM2_ESM.pdf [file 44172_2023_142_MOESM2_ESM.pdf]

# Description of Additional Supplementary Files

**File name:** Supplementary Movie 1

**Description:** Video illustrating how data point archetypes can exist in a dynamic system's signal output and encode system behaviours about the system's current state. Spikes reveal open-reading-frames embedded in the signal that represent an embodied model about the system's upcoming behaviour.
